# Supplementary material
Source: PubMed Central journal article supplement (PMC4835821)
Supplement: NIHMS721043-supplement-Supplemental_Material.pdf [file NIHMS721043-supplement-Supplemental_Material.pdf]

**SUPPLEMENTAL MATERIAL**

**Supplemental Figure 1.** Prevalence of ideal status for each of the 6 health factors/behaviors at each ARIC study visit. Physical activity was only assessed at Visits 1, 3, and 5.

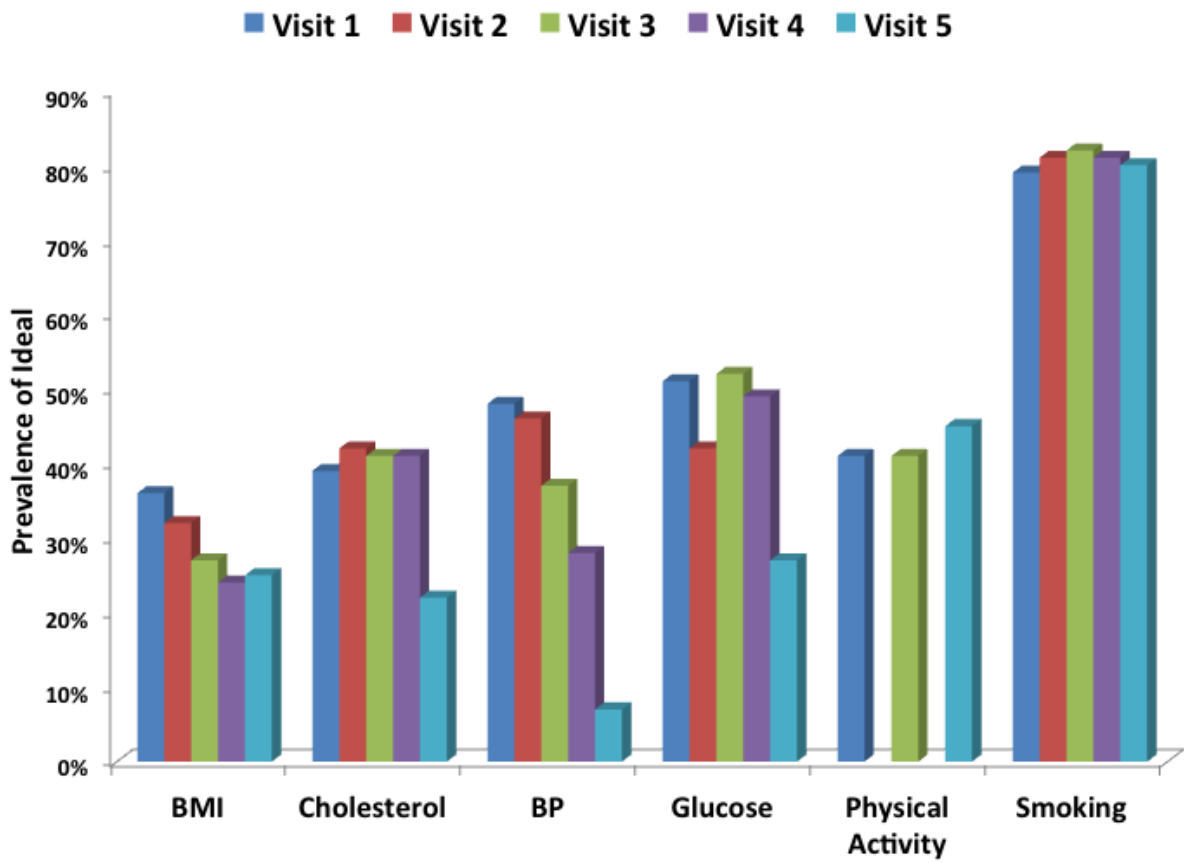

**Supplement Figure 2.** Prevalence of CVD based on category of percent cumulative CVHS attained from Visits 1 through 5 using inverse probability attrition weighting. P values are multivariable adjusted P for trend across categories and are adjusted for age, gender, race, and study field center.

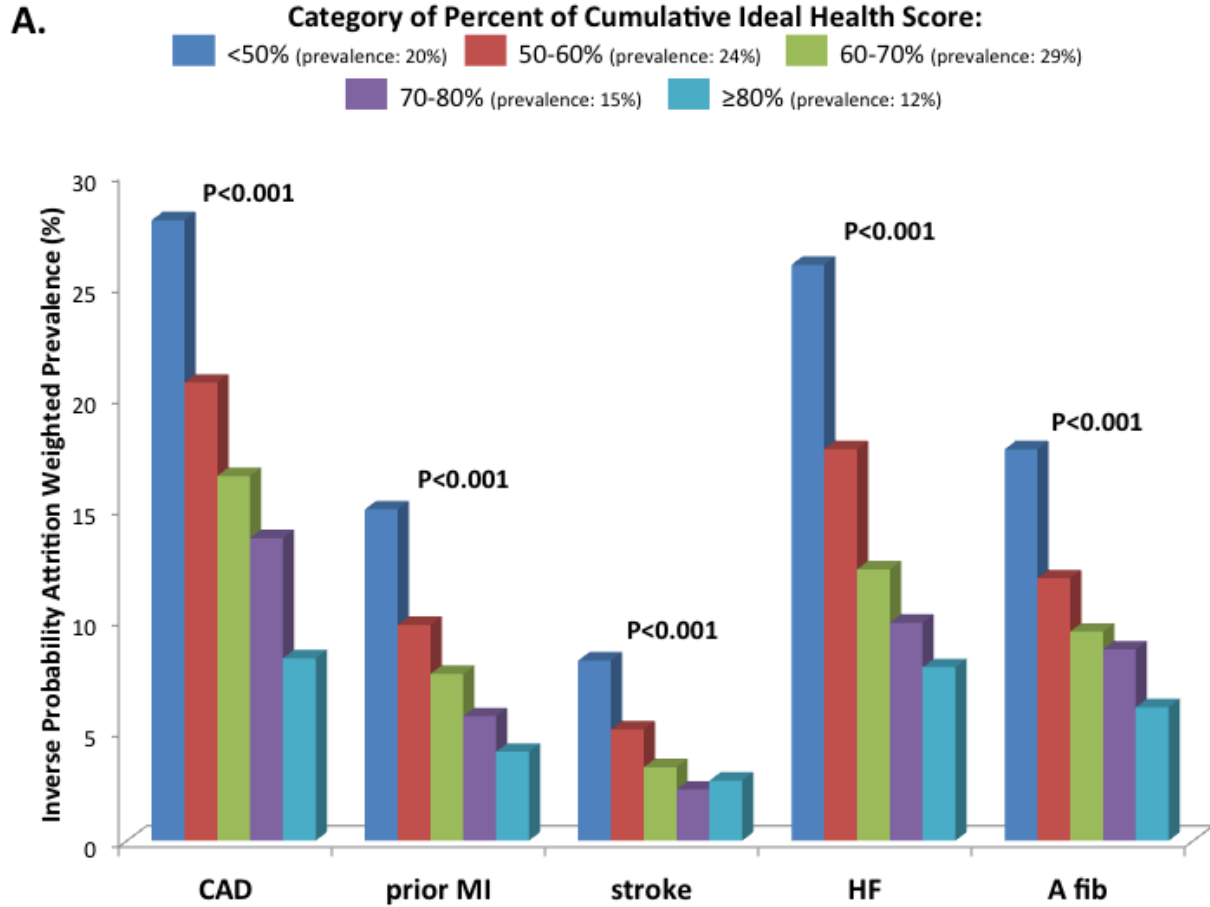

**Supplement Figure 3.** Prevalence of CVD based on slope of change in CVHS per decade of follow-up using inverse probability attrition weighting. Prevalence estimates are also adjusted for CVHS at Visit 1, age, gender, race, and study field center. P values are multivariable adjusted P for trend across categories and are adjusted for CVHS at Visit 1, age, gender, race, and study field center.

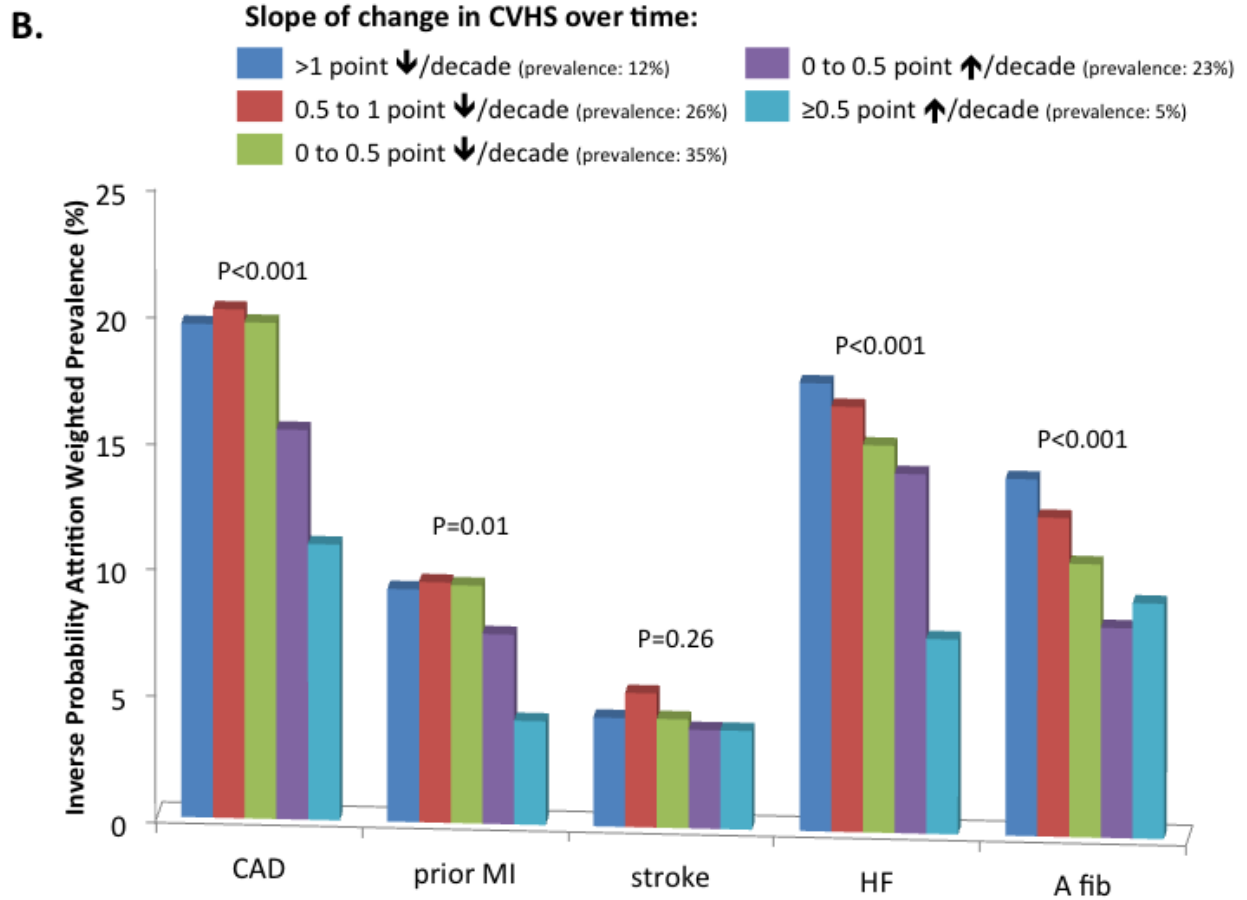

Supplemental Table 1. Prevalence of cardiovascular diseases by categories of percent cumulative Cardiovascular Health Score attained through mid-life and late-life stratified by gender (2,685 men, 3,835 women). Prevalence estimates and P values are adjusted for age, race, and Field Center. Interaction P value tests the interaction between category of percent cumulative attained CVHS and gender. Percent cumulative CVHS is modeled as a continuous variable. Values are multivariable adjusted means and 95% confidence intervals. M – male; F – female.

|          | Gender | Category of percent cumulative CVHS attained |                  |                  |                  |                 | P for trend | P for Interact |
|----------|--------|----------------------------------------------|------------------|------------------|------------------|-----------------|-------------|----------------|
|          |        | <50%                                         | 50-60%           | 60-70%           | 70-80%           | ≥80%            |             |                |
| CAD      | F      | 19.2 [16.9,21.5]                             | 12.8 [10.7,14.8] | 8.6 [6.8,10.5]   | 7.5 [5.0,10.0]   | 4.4 [1.8,7.0]   | <0.001      | 0.60           |
|          | M      | 37.6 [33.4,41.8]                             | 29.9 [26.6,33.1] | 25.2 [22.3,28.0] | 21.4 [17.2,25.6] | 13.3 [8.5,18.1] | <0.001      |                |
| Prior MI | F      | 11.5 [9.7,13.2]                              | 6.4 [4.8,7.9]    | 3.5 [2.4,9]      | 4.2 [2.3,6.0]    | 2.1 [0.1,4.0]   | <0.001      | 0.26           |
|          | M      | 18.6 [15.2,21.9]                             | 13.9 [11.3,16.5] | 11.8 [9.6,14]    | 8.0 [4.9,11.2]   | 6.7 [3.1,10.3]  | <0.001      |                |
| Stroke   | F      | 7.5 [6.1,8.8]                                | 4.0 [2.8,5.3]    | 2.6 [1.5,3.7]    | 1.4 [0.2,9]      | 2.0 [0.4,3.6]   | <0.001      | 0.38           |
|          | M      | 8.4 [6.3,10.4]                               | 5.5 [3.9,7.1]    | 3.7 [2.3,5.1]    | 2.8 [0.8,4.9]    | 3.7 [1.4,6.1]   | <0.001      |                |
| HF       | F      | 23.7 [21.4,26.1]                             | 14.3 [12.2,16.5] | 8.4 [6.5,10.4]   | 8.3 [5.7,10.9]   | 6.4 [3.7,9.1]   | <0.001      | 0.73           |
|          | M      | 26.9 [23.3,30.4]                             | 19.5 [16.7,22.2] | 15.2 [12.8,17.6] | 11.4 [7.9,14.9]  | 8.2 [4.2,12.2]  | <0.001      |                |
| A Fib    | F      | 13.8 [11.7,15.9]                             | 9.5 [7.7,11.4]   | 6.5 [4.8,8.1]    | 6.1 [3.9,8.3]    | 3.6 [1.3,5.8]   | <0.001      | 0.27           |
|          | M      | 19 [15.7,22.3]                               | 13.1 [10.5,15.6] | 11.9 [9.7,14.0]  | 9.9 [6.8,13.1]   | 7.6 [4.0,11.2]  | <0.001      |                |

Supplemental Table 2. Prevalence of cardiovascular diseases by categories of percent cumulative Cardiovascular Health Score attained through mid-life and late-life stratified by race (4,977 white and 1,543 black participants). Prevalence estimates and P values are adjusted for age, gender, and Field Center. Interaction P value tests the interaction between category of percent cumulative attained CVHS and race. Percent cumulative CVHS is modeled as a continuous variable. Values are multivariable adjusted means and 95% confidence intervals. B – black; W – white.

|          | Race | Category of percent cumulative ideal health score |                  |                  |                  |                | P for trend | P for interact |
|----------|------|---------------------------------------------------|------------------|------------------|------------------|----------------|-------------|----------------|
|          |      | <50%                                              | 50-60%           | 60-70%           | 70-80%           | ≥80%           |             |                |
| CAD      | W    | 29.7 [26.8,32.5]                                  | 21.8 [19.6,24]   | 17.4 [15.6,19.3] | 15.4 [12.9,17.8] | 10.5 [7.9,13]  | <0.001      | 0.15           |
|          | B    | 18.6 [15.8,21.4]                                  | 13.4 [10.3,16.4] | 9.3 [5.8,12.8]   | 6.1 [0.1,12.1]   | 4.5 [0,13.9]   | <0.001      |                |
| Prior MI | W    | 15.4 [13.2,17.6]                                  | 9.9 [8.2,11.7]   | 7.9 [6.5,9.3]    | 6.8 [4.9,8.6]    | 5.0 [3.1,6.9]  | <0.001      | 0.05           |
|          | B    | 11.2 [8.8,13.5]                                   | 7.4 [4.9,9.9]    | 3.6 [0.9,6.4]    | 1.7 [0,6.3]      | 2.3 [-4.8,9.3] | <0.001      |                |
| Stroke   | W    | 7.5 [6.1,8.9]                                     | 3.9 [2.8,5]      | 3 [2.1,3.9]      | 1.6 [0.4,2.8]    | 2.3 [1.0,3.5]  | <0.001      | 0.81           |
|          | B    | 9.0 [6.9,11]                                      | 6.6 [4.4,8.8]    | 2.8 [0.3,5.3]    | 3.5 [0,7.8]      | 4.6 [0,11.2]   | <0.001      |                |
| HF       | W    | 20.9 [18.5,23.4]                                  | 15 [13.1,16.9]   | 10.6 [9.1,12.2]  | 8.6 [6.5,10.7]   | 6.1 [3.9,8.3]  | <0.001      | 0.22           |
|          | B    | 32.9 [29.5,36.2]                                  | 20.9 [17.2,24.6] | 12.6 [8.5,16.8]  | 11.1 [4,18.3]    | 9.3 [0,20.5]   | <0.001      |                |
| A Fib    | W    | 19.7 [17.2,22.1]                                  | 11.8 [9.9,13.8]  | 10.3 [8.8,11.9]  | 9.1 [7.1,11.2]   | 6.6 [4.5,8.7]  | <0.001      | 0.89           |
|          | B    | 7.5 [5.4,9.7]                                     | 7.1 [4.9,9.4]    | 3.4 [0.9,5.9]    | 3.7 [0,7.9]      | 5.5 [0,12.1]   | 0.005       |                |

Supplemental Table 3. Measures of cardiovascular structure and function at Visit 5 by the percent cumulative CVHS attained between Visits 1 and 5 stratified by gender (1,552 men, 2,746 women). Values and P values are adjusted for age, race, and field center.

Interaction P value tests the interaction between category of percent cumulative attained CVHS and gender. Percent cumulative CVHS is modeled as a continuous variable. Values are multivariable adjusted means and 95% confidence intervals. M – male; F – female.

|                                    |   | Category of percent cumulative ideal health score |                  |                  |                  |                  | P or   | P for    |
|------------------------------------|---|---------------------------------------------------|------------------|------------------|------------------|------------------|--------|----------|
|                                    |   | <50%                                              | 50-60%           | 60-70%           | 70-80%           | ≥80%             | trend  | interact |
| <b><i>LV Structure</i></b>         |   |                                                   |                  |                  |                  |                  |        |          |
| LVEDV                              | F | 73.3 [71.7,75]                                    | 72.2 [70.9,73.6] | 69 [67.9,70.1]   | 66.6 [65.2,68.0] | 67 [65.5,68.4]   | <0.001 | 0.005    |
| (ml)                               | M | 99.8 [96.6,103.0]                                 | 95.2 [92.9,97.4] | 97.5 [95.7,99.4] | 95.6 [93,98.2]   | 94.8 [92,97.6]   | 0.04   |          |
| LV MWT                             | F | 1.00 [0.99,1.01]                                  | 0.98 [0.97,0.99] | 0.94 [0.94,0.95] | 0.92 [0.91,0.93] | 0.89 [0.88,0.9]  | <0.001 | 0.02     |
| (cm)                               | M | 1.07 [1.05,1.09]                                  | 1.03 [1.01,1.04] | 1.01 [1.00,1.02] | 0.98 [0.96,0.99] | 0.97 [0.96,0.99] | <0.001 |          |
| LV Mass                            | F | 146 [143,150]                                     | 141 [138,143]    | 129 [127,131]    | 120 [117,123]    | 113 [110,116]    | <0.001 | 0.05     |
| (g)                                | M | 184 [178,189]                                     | 165 [161,169]    | 163 [160,167]    | 152 [148,157]    | 148 [143,154]    | <0.001 |          |
| LVH                                | F | 17.8 [14.7,20.9]                                  | 13.5 [11.0,16]   | 8.5 [6.4,10.6]   | 7.1 [4.4,9.8]    | 3.7 [1.0,6.4]    | <0.001 | <0.001   |
|                                    | M | 6.6 [3.6,9.7]                                     | 4.3 [2.2,6.5]    | 4.8 [3,6.5]      | 3.1 [0.6,5.5]    | 2.4 [0,5.1]      | 0.02   |          |
| <b><i>LV Systolic Function</i></b> |   |                                                   |                  |                  |                  |                  |        |          |
| LVEF (%)                           | F | 66.7 [66.1,67.2]                                  | 67.1 [66.6,67.5] | 66.9 [66.5,67.3] | 66.8 [66.3,67.3] | 66.8 [66.3,67.3] | 0.88   | 0.41     |
|                                    | M | 64.8 [64.0,65.6]                                  | 64.9 [64.3,65.4] | 64.5 [64.0,64.9] | 65.3 [64.6,65.9] | 65.1 [64.4,65.8] | 0.55   |          |

|                                                    |   |                     |                     |                     |                     |                     |        |      |
|----------------------------------------------------|---|---------------------|---------------------|---------------------|---------------------|---------------------|--------|------|
| Longitudinal strain (%)                            | F | -18.2 [-18.4,-17.9] | -18.5 [-18.7,-18.3] | -18.4 [-18.6,-18.3] | -18.6 [-18.8,-18.4] | -18.9 [-19.1,-18.6] | <0.001 | 0.65 |
|                                                    | M | -17.6 [-18,-17.3]   | -17.7 [-18.0,-17.5] | -17.9 [-18.1,-17.7] | -18.2 [-18.5,-18.0] | -18.3 [-18.6,-18.0] | <0.001 |      |
| <b><i>LV Diastolic Function</i></b>                |   |                     |                     |                     |                     |                     |        |      |
| TDI e' (cm/s)                                      | F | 5.42 [5.27,5.57]    | 5.66 [5.54,5.78]    | 5.59 [5.49,5.69]    | 5.76 [5.63,5.89]    | 6.07 [5.94,6.21]    | <0.001 | 0.78 |
|                                                    | M | 5.63 [5.43,5.83]    | 5.61 [5.47,5.75]    | 5.78 [5.66,5.89]    | 6.01 [5.84,6.17]    | 6.07 [5.89,6.25]    | <0.001 |      |
| E/e' ratio                                         | F | 13.5 [13.1,13.8]    | 13 [12.7,13.3]      | 12.3 [12.1,12.6]    | 12.1 [11.7,12.4]    | 11.3 [11.0,11.7]    | <0.001 | 0.39 |
|                                                    | M | 12.1 [11.6,12.6]    | 12 [11.6,12.3]      | 10.9 [10.7,11.2]    | 10.5 [10.1,10.9]    | 10.1 [9.7,10.5]     | <0.001 |      |
| LA volume (ml)                                     | F | 46.9 [45.5,48.2]    | 45.1 [44.0,46.2]    | 41.9 [41.0,42.8]    | 39.6 [38.4,40.8]    | 39.1 [38.0,40.3]    | <0.001 | 0.01 |
|                                                    | M | 54.7 [52.4,57.1]    | 51 [49.3,52.7]      | 51.2 [49.8,52.6]    | 48.6 [46.7,50.5]    | 47.9 [45.8,50.0]    | <0.001 |      |
| <b><i>RV Function &amp; Pulmonary Pressure</i></b> |   |                     |                     |                     |                     |                     |        |      |
| RVFAC (%)                                          | F | 53.2 [52.4,54]      | 53.2 [52.5,53.9]    | 53.4 [52.9,54]      | 54.2 [53.5,54.9]    | 54.9 [54.2,55.5]    | <0.001 | 0.21 |
|                                                    | M | 51.4 [50.2,52.6]    | 50.6 [49.8,51.4]    | 50.6 [49.9,51.2]    | 51.4 [50.5,52.3]    | 52.4 [51.4,53.4]    | 0.10   |      |
| TR velocity (m/sec)                                | F | 2.47 [2.43,2.5]     | 2.43 [2.40,2.46]    | 2.36 [2.33,2.38]    | 2.33 [2.3,2.36]     | 2.33 [2.3,2.36]     | <0.001 | 0.99 |
|                                                    | M | 2.46 [2.4,2.52]     | 2.35 [2.31,2.39]    | 2.35 [2.32,2.39]    | 2.32 [2.28,2.36]    | 2.28 [2.23,2.32]    | <0.001 |      |
| <b><i>Arterial Structure &amp; Function</i></b>    |   |                     |                     |                     |                     |                     |        |      |
| Aortic root diameter                               | F | 3.09 [3.06,3.12]    | 3.08 [3.06,3.11]    | 3.01 [2.99,3.03]    | 2.97 [2.94,3]       | 2.97 [2.95,3.00]    | <0.001 | 0.01 |
|                                                    | M | 3.51 [3.46,3.55]    | 3.46 [3.42,3.49]    | 3.46 [3.43,3.49]    | 3.43 [3.39,3.47]    | 3.42 [3.38,3.46]    | 0.008  |      |



|           |   |                  |                  |                  |                  |                  |        |  |       |
|-----------|---|------------------|------------------|------------------|------------------|------------------|--------|--|-------|
| (cm)      |   |                  |                  |                  |                  |                  |        |  |       |
| Ea        | F | 1.89 [1.84,1.93] | 1.84 [1.80,1.88] | 1.91 [1.88,1.94] | 2.01 [1.96,2.05] | 1.91 [1.87,1.96] | 0.002  |  | 0.002 |
| (mmHg/ml) | M | 1.66 [1.60,1.72] | 1.71 [1.66,1.75] | 1.73 [1.69,1.77] | 1.69 [1.64,1.75] | 1.69 [1.64,1.75] | 0.79   |  |       |
| MAP       | F | 91 [90,92]       | 89 [88,90]       | 89 [88,89]       | 88 [87,89]       | 85 [84,86]       | <0.001 |  | 0.004 |
| (mmHg)    | M | 89 [87,90]       | 89 [88,90]       | 89 [88,90]       | 88 [87,90]       | 87 [85,88]       | 0.07   |  |       |
| PWV       | F | 1230 [1190,1270] | 1174 [1143,1205] | 1130 [1105,1155] | 1141 [1109,1172] | 1079 [1048,1111] | <0.001 |  | 0.14  |
| (cm/s)    | M | 1336 [1259,1413] | 1239 [1189,1290] | 1184 [1143,1226] | 1116 [1060,1172] | 1141 [1080,1203] | <0.001 |  |       |

---

Supplemental Table 4. Measures of cardiovascular structure and function at Visit 5 by category of percent cumulative CVHS attained between Visits 1 and 5 stratified by race (3,326 white and 972 black participants). Values and P values are adjusted for age, gender, and field center. Interaction P value tests the interaction between category of percent cumulative attained CVHS and race. Percent cumulative CVHS is modeled as a continuous variable. Values are multivariable adjusted means and 95% confidence intervals. B – black; W – white.

| Race                        |   | Category of percent cumulative ideal health score |                  |                  |                  |                  | P for trend | P for Interact |
|-----------------------------|---|---------------------------------------------------|------------------|------------------|------------------|------------------|-------------|----------------|
|                             |   | <50%                                              | 50-60%           | 60-70%           | 70-80%           | ≥80%             |             |                |
| <i>LV Structure</i>         |   |                                                   |                  |                  |                  |                  |             |                |
| LVEDV                       | W | 82.8 [80.8,84.8]                                  | 80.0 [78.5,81.4] | 79.3 [78.2,80.4] | 77.6 [76.2,79.0] | 76.8 [75.4,78.2] | <0.001      | 0.05           |
| (ml)                        | B | 84.4 [82.1,86.7]                                  | 82.7 [80.5,84.8] | 80.3 [78,82.5]   | 73.9 [70.4,77.5] | 80.5 [74.9,86.1] | <0.001      |                |
| LV MWT                      | W | 1.03 [1.01,1.04]                                  | 0.99 [0.99,1]    | 0.97 [0.96,0.97] | 0.94 [0.93,0.95] | 0.92 [0.91,0.93] | <0.001      | 0.57           |
| (cm)                        | B | 1.03 [1.02,1.05]                                  | 1.01 [0.99,1.03] | 0.98 [0.96,1.00] | 0.93 [0.90,0.95] | 0.93 [0.89,0.97] | <0.001      |                |
| LV Mass                     | W | 162 [159,166]                                     | 151 [148,153]    | 143 [141,145]    | 133 [131,136]    | 127 [124,129]    | <0.001      | 0.85           |
| (g)                         | B | 154 [149,158]                                     | 146 [141,150]    | 137 [133,142]    | 124 [117,131]    | 127 [116,138]    | <0.001      |                |
| LVH                         | W | 15.6 [12.6,18.5]                                  | 10.7 [8.6,12.8]  | 7.1 [5.4,8.7]    | 6.4 [4.3,8.5]    | 3.3 [1.3,5.4]    | <0.001      | 0.51           |
|                             | B | 10.8 [7.4,14.2]                                   | 8.1 [4.9,11.4]   | 8.0 [4.6,11.3]   | 2.1 [0,7.4]      | 4.6 [0,13]       | 0.004       |                |
| <i>LV Systolic Function</i> |   |                                                   |                  |                  |                  |                  |             |                |
| LVEF (%)                    | W | 66.3 [65.7,66.9]                                  | 66.5 [66.1,66.9] | 66.2 [65.9,66.5] | 66.3 [65.9,66.7] | 66.3 [65.9,66.7] | 0.48        | 0.03           |

|                                                    |   |                     |                     |                     |                     |                     |        |      |
|----------------------------------------------------|---|---------------------|---------------------|---------------------|---------------------|---------------------|--------|------|
|                                                    | B | 65.1 [64.4,65.8]    | 65.4 [64.8,66.1]    | 65.2 [64.5,65.9]    | 66.4 [65.3,67.6]    | 66 [64.2,67.8]      | 0.05   |      |
| Longitudi                                          | W | -18.1 [-18.3,-17.8] | -18.3 [-18.5,-18.1] | -18.4 [-18.5,-18.3] | -18.5 [-18.7,-18.3] | -18.7 [-18.9,-18.6] | <0.001 |      |
| nal strain                                         |   |                     |                     |                     |                     |                     |        | 0.04 |
| (%)                                                | B | -17.6 [-17.9,-17.2] | -17.8 [-18.1,-17.5] | -17.7 [-18,-17.4]   | -18.5 [-19.0,-18.0] | -18.6 [-19.4,-17.9] | <0.001 |      |
| <b><i>LV Diastolic Function</i></b>                |   |                     |                     |                     |                     |                     |        |      |
| TDI e'                                             | W | 5.63 [5.48,5.78]    | 5.64 [5.53,5.75]    | 5.67 [5.58,5.75]    | 5.86 [5.75,5.97]    | 6.08 [5.97,6.18]    | <0.001 |      |
| (cm/s)                                             | B | 5.27 [5.08,5.46]    | 5.61 [5.43,5.79]    | 5.67 [5.48,5.86]    | 5.87 [5.57,6.17]    | 6.21 [5.74,6.69]    | <0.001 | 0.10 |
| E/e' ratio                                         | W | 12.7 [12.3,13.1]    | 12.6 [12.4,12.9]    | 11.9 [11.7,12.1]    | 11.5 [11.2,11.7]    | 10.9 [10.7,11.2]    | <0.001 |      |
|                                                    | B | 13.3 [12.8,13.8]    | 12.7 [12.2,13.1]    | 11.5 [11.0,12.0]    | 11.5 [10.8,12.3]    | 10.3 [9.1,11.5]     | <0.001 | 0.08 |
| LA                                                 | W | 49.2 [47.6,50.8]    | 46.9 [45.8,48]      | 45.2 [44.4,46.1]    | 43 [41.9,44.1]      | 41.9 [40.8,43]      | <0.001 |      |
| volume                                             |   |                     |                     |                     |                     |                     |        | 0.20 |
| (ml)                                               | B | 51.2 [49.5,53]      | 48.3 [46.6,50]      | 45.5 [43.7,47.3]    | 41.2 [38.4,44]      | 46.2 [41.8,50.7]    | <0.001 |      |
| <b><i>RV Function &amp; Pulmonary Pressure</i></b> |   |                     |                     |                     |                     |                     |        |      |
| RVFAC                                              | W | 52.4 [51.6,53.3]    | 52.1 [51.5,52.7]    | 52.3 [51.9,52.8]    | 53 [52.4,53.6]      | 53.9 [53.3,54.4]    | <0.001 |      |
| (%)                                                | B | 52.9 [51.9,54.0]    | 52.9 [51.9,53.9]    | 52.4 [51.4,53.4]    | 53.7 [52.1,55.3]    | 54.2 [51.7,56.8]    | 0.35   | 0.36 |
| TR                                                 | W | 2.46 [2.42,2.50]    | 2.42 [2.39,2.44]    | 2.36 [2.34,2.38]    | 2.34 [2.31,2.36]    | 2.32 [2.29,2.34]    | <0.001 |      |
| velocity                                           |   |                     |                     |                     |                     |                     |        | 0.68 |
| (m/sec)                                            | B | 2.46 [2.41,2.5]     | 2.39 [2.34,2.43]    | 2.35 [2.3,2.39]     | 2.29 [2.22,2.36]    | 2.34 [2.23,2.44]    | <0.001 |      |

***Arterial Structure & Function***

|                           |   |                  |                  |                  |                  |                  |        |      |
|---------------------------|---|------------------|------------------|------------------|------------------|------------------|--------|------|
| Aortic root diameter (cm) | W | 3.24 [3.21,3.27] | 3.23 [3.21,3.25] | 3.19 [3.17,3.21] | 3.16 [3.14,3.19] | 3.15 [3.13,3.18] | <0.001 |      |
|                           | B | 3.20 [3.16,3.24] | 3.17 [3.13,3.2]  | 3.11 [3.07,3.14] | 3.03 [2.96,3.09] | 3.11 [3.01,3.21] | <0.001 | 0.10 |
| Ea (mmHg/ml)              | W | 1.78 [1.73,1.83] | 1.78 [1.74,1.81] | 1.80 [1.77,1.83] | 1.87 [1.83,1.91] | 1.82 [1.78,1.85] | 0.06   |      |
|                           | B | 1.90 [1.84,1.96] | 1.85 [1.79,1.91] | 1.99 [1.93,2.04] | 2.01 [1.92,2.10] | 1.94 [1.79,2.09] | 0.01   | 0.09 |
| MAP (mmHg)                | W | 89 [88,90]       | 88 [87,89]       | 88 [87,88]       | 88 [87,89]       | 85 [84,86]       | <0.001 |      |
|                           | B | 93 [92,95]       | 91 [90,93]       | 92 [91,94]       | 90 [87,92]       | 89 [85,92]       | 0.004  | 0.71 |
| PWV (cm/s)                | W | 1249 [1199,1299] | 1201 [1168,1234] | 1138 [1112,1163] | 1124 [1092,1155] | 1091 [1061,1122] | <0.001 |      |
|                           | B | 1308 [1258,1358] | 1204 [1158,1250] | 1205 [1158,1251] | 1162 [1090,1233] | 1130 [1018,1241] | <0.001 | 0.87 |

---

Supplemental Table 5. Prevalence of cardiovascular diseases by categories of slope of change in Cardiovascular Health Score through mid-life and late-life stratified by gender (2,685 men, 3,835 women). Prevalence estimates and P values are adjusted for age, race, and Field Center. Interaction P value tests the interaction between category of slope of change in CVHS and gender. Values are multivariable adjusted means and 95% confidence intervals. M – male; F – female.

|          |                           | Slope of Change in CVHS per decade of follow-up |                               |                               |                            |                 | Adj P for trend | P for interact |
|----------|---------------------------|-------------------------------------------------|-------------------------------|-------------------------------|----------------------------|-----------------|-----------------|----------------|
| Gender   | >1 point /decade decrease | 0.5 – 1 point/decade decrease                   | 0 – 0.5 point/decade decrease | 0 – 0.5 point/decade increase | ≥0.5 point/decade increase |                 |                 |                |
| CAD      | M                         | 27.8 [22.3,33.3]                                | 30.0 [26.7,33.4]              | 28.7 [25.9,31.4]              | 22.4 [18.9,25.8]           | 10.5 [3.6,17.4] | <0.001          | 0.03           |
|          | F                         | 12.9 [10.1,15.8]                                | 11.4 [9.5,13.4]               | 11.1 [9.4,12.8]               | 8.6 [6.4,10.9]             | 10.6 [5.6,15.5] |                 |                |
| Prior MI | M                         | 12.4 [7.9,16.8]                                 | 13.3 [10.6,16]                | 13.7 [11.6,15.9]              | 10.4 [7.8,13.1]            | 4.0 [0,9.2]     | 0.02            | 0.12           |
|          | F                         | 6.8 [4.5,9]                                     | 5.8 [4.3,7.3]                 | 5.5 [4.2,6.8]                 | 4.7 [3,6.4]                | 4.7 [1,8.4]     |                 |                |
| Stroke   | M                         | 5.3 [2.6,8]                                     | 5.2 [3.6,6.9]                 | 5.1 [3.7,6.4]                 | 4.5 [2.8,6.1]              | 1 [0,4.4]       | 0.14            | 0.23           |
|          | F                         | 3.7 [2,5.4]                                     | 4.5 [3.3,5.6]                 | 3.5 [2.5,4.5]                 | 2.7 [1.3,4]                | 3.9 [0.9,6.9]   |                 |                |
| HF       | M                         | 19.2 [14.6,23.8]                                | 18.7 [15.8,21.5]              | 17.8 [15.5,20.2]              | 14.3 [11.4,17.2]           | 7.3 [1.4,13.1]  | 0.002           | 0.18           |
|          | F                         | 14.3 [11.3,17.3]                                | 13.2 [11.2,15.2]              | 12.1 [10.3,13.8]              | 12.2 [9.8,14.5]            | 7.4 [2.3,12.6]  |                 |                |
| A Fib    | M                         | 14.4 [10,18.8]                                  | 15.2 [12.5,17.8]              | 12.7 [10.6,14.9]              | 9.5 [6.9,12.1]             | 8.4 [3.1,13.6]  | 0.005           | 0.09           |

|   |                 |                |               |               |                |      |
|---|-----------------|----------------|---------------|---------------|----------------|------|
| F | 11.1 [8.4,13.8] | 8.2 [6.5,10.0] | 7.5 [6.1,9.0] | 6.5 [4.5,8.5] | 8.5 [4.2,12.8] | 0.04 |
|---|-----------------|----------------|---------------|---------------|----------------|------|

---

Supplemental Table 6. Prevalence of cardiovascular diseases by categories of slope of change in Cardiovascular Health Score through mid-life and late-life stratified by race (4,977 white and 1,543 black participants). Prevalence estimates and P values are adjusted for age, gender, and Field Center. Interaction P value tests the interaction between category of slope of change in CVHS and race. Values are multivariable adjusted means and 95% confidence intervals. B – black; W – white.

|          | Race | Slope of Change in CVHS per decade of follow-up |                               |                               |                               |                            | Adj P for trend | P for interact |
|----------|------|-------------------------------------------------|-------------------------------|-------------------------------|-------------------------------|----------------------------|-----------------|----------------|
|          |      | >1 point /decade decrease                       | 0.5 – 1 point/decade decrease | 0 – 0.5 point/decade decrease | 0 – 0.5 point/decade increase | ≥0.5 point/decade increase |                 |                |
| CAD      | W    | 20.2 [17.2,23.2]                                | 20.6 [18.6,22.6]              | 19.8 [18.1,21.6]              | 14.4 [12.0,16.8]              | 7.3 [2.2,12.3]             | <0.001          | 0.08           |
|          | B    | 16.4 [9.7,23.1]                                 | 13.5 [9.8,17.3]               | 13.2 [10.4,16.0]              | 13 [9.8,16.3]                 | 12.8 [6.0,19.6]            |                 |                |
| Prior MI | W    | 8.7 [6.3,11.0]                                  | 9.1 [7.6,10.7]                | 9.6 [8.2,10.9]                | 6.9 [5.1,8.7]                 | 4.7 [0.9,8.5]              | 0.05            | 0.60           |
|          | B    | 13.9 [7.8,20.0]                                 | 8.1 [4.9,11.3]                | 6.6 [4.4,8.8]                 | 7.1 [4.6,9.6]                 | 1.4 [0,6.5]                |                 |                |
| Stroke   | W    | 3.5 [2.0,4.9]                                   | 4.0 [3.0,5.0]                 | 3.3 [2.4,4.2]                 | 3.0 [1.8,4.2]                 | 2.4 [0,4.9]                | 0.24            | 0.39           |
|          | B    | 7.1 [2.3,11.9]                                  | 7.4 [4.7,10.0]                | 7.0 [5.0,9.0]                 | 5.1 [2.7,7.4]                 | 2.8 [0,7.7]                |                 |                |
| HF       | W    | 13.3 [10.7,15.8]                                | 12.9 [11.2,14.6]              | 12.1 [10.6,13.6]              | 10.1 [8.0,12.1]               | 5.7 [1.4,10.0]             | 0.002           | 0.96           |
|          | B    | 27.1 [19,35.3]                                  | 23.7 [19.2,28.2]              | 22.1 [18.8,25.5]              | 21.8 [17.9,25.7]              | 12 [3.8,20.3]              |                 |                |
| A Fib    | W    | 14.3 [11.7,17]                                  | 12.2 [10.5,13.9]              | 10.6 [9.2,12.1]               | 8.8 [6.8,10.8]                | 6.4 [2.2,10.6]             | <0.001          | 0.09           |

|          |            |                |               |               |                 |      |
|----------|------------|----------------|---------------|---------------|-----------------|------|
| <b>B</b> | 5 [0,10.2] | 7.4 [4.5,10.3] | 6.2 [4.2,8.3] | 3.9 [1.6,6.2] | 10.9 [6.0,15.7] | 0.99 |
|----------|------------|----------------|---------------|---------------|-----------------|------|

---



Supplemental Table 7. Measures of cardiovascular structure and function at Visit 5 by category of slope of change in CVHS between Visits 1 and 5 stratified by gender (1,552 men, 2,746 women). Values and P values are adjusted for age, race, and field center.

Interaction P value tests the interaction between category of slope of change in CVHS and gender. Values are multivariable adjusted means and 95% confidence intervals. M – male; F – female.

|                     |   | Slope of Change in CVHS per decade of follow-up |                               |                               |                               |                            | Adj P  | P for |
|---------------------|---|-------------------------------------------------|-------------------------------|-------------------------------|-------------------------------|----------------------------|--------|-------|
| Gender              |   | >1 point /decade decrease                       | 0.5 – 1 point/decade decrease | 0 – 0.5 point/decade decrease | 0 – 0.5 point/decade increase | ≥0.5 point/decade increase |        |       |
| <i>LV Structure</i> |   |                                                 |                               |                               |                               |                            |        |       |
| LVEDV (ml)          | M | 96.2 [92.7,99.8]                                | 95.3 [93.0,97.6]              | 97.4 [95.5,99.3]              | 96.9 [94.6,99.2]              | 95.6 [91.3,99.9]           | 0.67   | 0.62  |
|                     | F | 69.7 [68.0,71.4]                                | 69.6 [68.4,70.8]              | 69.3 [68.2,70.3]              | 69.6 [68.2,71.1]              | 68.5 [65.3,71.6]           | 0.70   |       |
| LV MWT (cm)         | M | 1.04 [1.02,1.06]                                | 1.02 [1.00,1.03]              | 1.01 [1.00,1.02]              | 1.00 [0.98,1.01]              | 0.98 [0.96,1.01]           | <0.001 | 0.75  |
|                     | F | 0.97 [0.96,0.99]                                | 0.96 [0.95,0.97]              | 0.94 [0.93,0.95]              | 0.92 [0.91,0.93]              | 0.89 [0.87,0.91]           | <0.001 |       |
| LV Mass (g)         | M | 174 [168,180]                                   | 163 [159,167]                 | 163 [160,167]                 | 157 [153,162]                 | 153 [145,161]              | <0.001 | 0.67  |
|                     | F | 138 [134,141]                                   | 133 [131,136]                 | 129 [127,131]                 | 122 [120,125]                 | 114 [107,120]              | <0.001 |       |
| LVH                 | M | 6.4 [3.0,9.7]                                   | 3.9 [1.8,6.1]                 | 4.5 [2.7,6.3]                 | 3.4 [1.3,5.5]                 | 4.1 [0.1,8.2]              | 0.38   | 0.86  |
|                     | F | 11.1 [7.8,14.3]                                 | 11.2 [9.0,13.5]               | 10.5 [8.5,12.4]               | 6.1 [3.4,8.7]                 | 6.4 [0.5,12.3]             | 0.01   |       |

***LV Systolic Function***

|                         |   |                     |                     |                     |                     |                     |        |      |
|-------------------------|---|---------------------|---------------------|---------------------|---------------------|---------------------|--------|------|
| LVEF (%)                | M | 64.9 [64.1,65.8]    | 64.8 [64.2,65.3]    | 64.9 [64.4,65.3]    | 64.9 [64.3,65.4]    | 64.6 [63.5,65.6]    | 0.85   | 0.51 |
|                         | F | 66.8 [66.3,67.4]    | 67.1 [66.7,67.5]    | 66.6 [66.3,67]      | 66.9 [66.4,67.4]    | 67.4 [66.3,68.4]    | 0.98   |      |
| Longitudinal Strain (%) | M | -17.8 [-18.2,-17.5] | -17.9 [-18.2,-17.7] | -17.9 [-18.1,-17.7] | -17.9 [-18.2,-17.7] | -18.4 [-18.8,-17.9] | 0.25   | 0.06 |
|                         | F | -18.3 [-18.6,-18.1] | -18.4 [-18.5,-18.2] | -18.5 [-18.6,-18.3] | -18.9 [-19.1,-18.7] | -19.1 [-19.6,-18.7] | <0.001 |      |

***LV Diastolic Function***

|                |   |                  |                  |                  |                  |                  |        |      |
|----------------|---|------------------|------------------|------------------|------------------|------------------|--------|------|
| TDI e' (cm/s)  | M | 5.60 [5.38,5.83] | 5.67 [5.52,5.81] | 5.86 [5.75,5.98] | 5.93 [5.79,6.07] | 5.84 [5.57,6.11] | 0.01   | 0.51 |
|                | F | 5.49 [5.33,5.64] | 5.60 [5.49,5.7]  | 5.75 [5.66,5.84] | 5.84 [5.72,5.97] | 6.04 [5.75,6.32] | <0.001 |      |
| E/e' ratio     | M | 11.3 [10.7,11.8] | 11.4 [11.0,11.7] | 11.2 [10.9,11.5] | 10.8 [10.5,11.1] | 10.8 [10.1,11.4] | 0.04   | 0.45 |
|                | F | 12.8 [12.4,13.2] | 12.6 [12.4,12.9] | 12.4 [12.1,12.6] | 12 [11.7,12.3]   | 11.9 [11.2,12.7] | 0.001  |      |
| LA volume (ml) | M | 52.5 [49.8,55.1] | 50.6 [48.9,52.2] | 50.8 [49.4,52.2] | 50.3 [48.6,52.0] | 48.3 [45.2,51.5] | 0.14   | 0.09 |
|                | F | 43.0 [41.6,44.4] | 43.2 [42.2,44.1] | 41.7 [40.8,42.5] | 42.2 [41,43.4]   | 41.4 [38.8,44]   | 0.10   |      |

***RV Function & Pulmonary Pressure***

|             |   |                  |                  |                  |                  |                  |      |      |
|-------------|---|------------------|------------------|------------------|------------------|------------------|------|------|
| RVFAC (%)   | M | 51.0 [49.8,52.3] | 50.6 [49.8,51.5] | 51.6 [51.0,52.3] | 51.2 [50.4,52.1] | 49.4 [47.9,51]   | 0.74 | 0.12 |
|             | F | 53.2 [52.3,54.0] | 53.7 [53.2,54.3] | 53.5 [53,54.0]   | 54.3 [53.7,55.0] | 55.6 [54.1,57.1] | 0.01 |      |
| TR velocity | M | 2.37 [2.31,2.43] | 2.37 [2.33,2.41] | 2.34 [2.31,2.37] | 2.35 [2.31,2.39] | 2.21 [2.13,2.28] | 0.01 | 0.61 |

|       |   |                  |                  |                  |                  |                 |        |  |
|-------|---|------------------|------------------|------------------|------------------|-----------------|--------|--|
| (m/s) | F | 2.43 [2.39,2.46] | 2.41 [2.38,2.43] | 2.36 [2.34,2.38] | 2.34 [2.31,2.38] | 2.26 [2.2,2.32] | <0.001 |  |
|-------|---|------------------|------------------|------------------|------------------|-----------------|--------|--|

***Arterial Structure & Function***

|               |   |                  |                  |                  |                  |                  |        |      |
|---------------|---|------------------|------------------|------------------|------------------|------------------|--------|------|
| Aortic Root   | M | 3.48 [3.43,3.53] | 3.45 [3.42,3.48] | 3.45 [3.42,3.48] | 3.43 [3.39,3.46] | 3.53 [3.47,3.6]  | 0.99   | 0.66 |
| Diameter (cm) | F | 3.06 [3.03,3.09] | 3.03 [3.00,3.05] | 3.01 [2.99,3.03] | 3.01 [2.99,3.04] | 2.98 [2.92,3.04] | 0.02   |      |
| Ea            | M | 1.68 [1.61,1.74] | 1.71 [1.66,1.75] | 1.71 [1.67,1.74] | 1.72 [1.68,1.77] | 1.66 [1.58,1.74] | 0.78   | 0.11 |
| (mmHg/ml)     | F | 1.94 [1.88,1.99] | 1.88 [1.85,1.92] | 1.95 [1.92,1.98] | 1.87 [1.83,1.92] | 1.90 [1.81,1.99] | 0.47   |      |
| MAP (mmHg)    | M | 88 [87,90]       | 89 [88,90]       | 89 [88,90]       | 88 [87,89]       | 87 [84,89]       | 0.22   | 0.09 |
|               | F | 92 [91,93]       | 89 [88,90]       | 88 [87,89]       | 86 [85,87]       | 85 [83,87]       | <0.001 |      |
| PWV (cm/s)    | M | 1197 [1114,1280] | 1184 [1134,1235] | 1161 [1120,1202] | 1253 [1203,1303] | 1159 [1061,1256] | 0.43   | 0.02 |
|               | F | 1184 [1145,1222] | 1147 [1120,1174] | 1152 [1129,1176] | 1112 [1081,1144] | 1057 [988,1125]  | 0.002  |      |

---

Supplemental Table 8. Measures of cardiovascular structure and function at Visit 5 by category of slope of change in CVHS between Visits 1 and 5 stratified by race (3,326 white and 972 black participants). Values and P values are adjusted for age, gender, and field center. Interaction P value tests the interaction between category of slope of change in CVHS and race. Values are multivariable adjusted means and 95% confidence intervals. B – black; W – white.

|                             |                              | Slope of Change in CVHS per decade of follow-up |                                     |                                     |                                  |                  | Adj P<br>for<br>trend | P for<br>intera<br>ct |
|-----------------------------|------------------------------|-------------------------------------------------|-------------------------------------|-------------------------------------|----------------------------------|------------------|-----------------------|-----------------------|
| Race                        | >1 point /decade<br>decrease | 0.5 – 1<br>point/decade<br>decrease             | 0 – 0.5<br>point/decade<br>decrease | 0 – 0.5<br>point/decade<br>increase | ≥0.5<br>point/decade<br>increase |                  |                       |                       |
| <i>LV Structure</i>         |                              |                                                 |                                     |                                     |                                  |                  |                       |                       |
| LVEDV (ml)                  | W                            | 79.4 [77.7,81.2]                                | 78.5 [77.3,79.7]                    | 79 [77.9,80.1]                      | 79.2 [77.8,80.7]                 | 78 [74.9,81.0]   | 0.90                  | 0.34                  |
|                             | B                            | 77.4 [72.9,81.9]                                | 81.9 [79.3,84.5]                    | 82.1 [80.0,84.1]                    | 81.6 [79.3,83.9]                 | 80 [75.2,84.8]   | 0.64                  |                       |
| LV MWT<br>(cm)              | W                            | 1.00 [0.98,1.01]                                | 0.97 [0.96,0.98]                    | 0.96 [0.95,0.97]                    | 0.94 [0.93,0.95]                 | 0.92 [0.90,0.93] | <0.001                | 0.88                  |
|                             | B                            | 1.00 [0.96,1.03]                                | 1.03 [1.01,1.05]                    | 0.99 [0.98,1.01]                    | 0.98 [0.96,1.00]                 | 0.96 [0.92,0.99] | 0.001                 |                       |
| LV Mass (g)                 | W                            | 152 [149,155]                                   | 142 [140,144]                       | 141 [139,143]                       | 135 [133,138]                    | 128 [122,133]    | <0.001                | 0.71                  |
|                             | B                            | 141 [132,151]                                   | 153 [147,158]                       | 143 [139,147]                       | 136 [131,141]                    | 132 [122,141]    | <0.001                |                       |
| LVH                         | W                            | 9.4 [6.9,12.0]                                  | 8.3 [6.6,10.1]                      | 7.9 [6.3,9.5]                       | 5.4 [3.3,7.6]                    | 6 [1.6,10.5]     | 0.03                  | 0.45                  |
|                             | B                            | 7.3 [0.4,14.1]                                  | 10.2 [6.3,14.1]                     | 9.6 [6.7,12.6]                      | 4.9 [1.5,8.4]                    | 5.5 [0,12.6]     | 0.13                  |                       |
| <i>LV Systolic Function</i> |                              |                                                 |                                     |                                     |                                  |                  |                       |                       |

|                         |   |                     |                     |                     |                     |                     |       |      |
|-------------------------|---|---------------------|---------------------|---------------------|---------------------|---------------------|-------|------|
| LVEF (%)                | W | 66.2 [65.7,66.7]    | 66.4 [66.1,66.8]    | 66.3 [66.0,66.6]    | 66.2 [65.8,66.6]    | 66.5 [65.7,67.4]    | 0.96  | 0.52 |
|                         | B | 66.2 [64.8,67.6]    | 65.5 [64.7,66.3]    | 64.9 [64.3,65.6]    | 65.8 [65.1,66.6]    | 65.2 [63.7,66.7]    | 0.90  |      |
| Longitudinal strain (%) | W | -18.2 [-18.4,-18.0] | -18.4 [-18.6,-18.3] | -18.4 [-18.5,-18.3] | -18.6 [-18.8,-18.4] | -19 [-19.4,-18.7]   | 0.001 | 0.82 |
|                         | B | -18.1 [-18.7,-17.5] | -17.4 [-17.8,-17.0] | -17.8 [-18.0,-17.5] | -18.1 [-18.4,-17.8] | -18.1 [-18.8,-17.4] | 0.08  |      |

### ***LV Diastolic Function***

|                |   |                  |                  |                  |                  |                  |        |      |
|----------------|---|------------------|------------------|------------------|------------------|------------------|--------|------|
| TDI e' (cm/s)  | W | 5.53 [5.40,5.66] | 5.68 [5.58,5.77] | 5.85 [5.77,5.93] | 5.94 [5.83,6.05] | 5.93 [5.70,6.16] | <0.001 | 0.25 |
|                | B | 5.68 [5.30,6.07] | 5.40 [5.18,5.62] | 5.59 [5.42,5.76] | 5.66 [5.46,5.85] | 5.85 [5.45,6.25] | 0.17   |      |
| E/e' ratio     | W | 12.2 [11.9,12.6] | 12.0 [11.8,12.2] | 11.8 [11.6,12.0] | 11.4 [11.2,11.7] | 11.3 [10.7,11.8] | <0.001 | 0.20 |
|                | B | 12.0 [11.0,13.0] | 12.8 [12.3,13.4] | 12.2 [11.8,12.6] | 12.0 [11.5,12.5] | 12.3 [11.3,13.3] | 0.26   |      |
| LA volume (ml) | W | 46 [44.6,47.3]   | 45.3 [44.4,46.2] | 44.6 [43.7,45.4] | 44.5 [43.4,45.6] | 41.5 [39.1,43.9] | 0.007  | 0.10 |
|                | B | 46.8 [43.2,50.4] | 48.3 [46.3,50.4] | 46.6 [45,48.1]   | 47.6 [45.8,49.4] | 49.5 [45.7,53.2] | 0.68   |      |

### ***RV Function & Pulmonary Pressure***

|                   |   |                  |                  |                  |                  |                  |        |      |
|-------------------|---|------------------|------------------|------------------|------------------|------------------|--------|------|
| RVFAC (%)         | W | 52.3 [51.5,53.0] | 52.4 [51.9,52.9] | 52.8 [52.3,53.2] | 53.4 [52.8,54.1] | 52.9 [51.6,54.2] | 0.02   | 0.23 |
|                   | B | 52.7 [50.6,54.8] | 53.5 [52.3,54.8] | 52.9 [52.0,53.8] | 52.6 [51.5,53.6] | 52.9 [50.8,55.0] | 0.53   |      |
| TR velocity (m/s) | W | 2.41 [2.38,2.44] | 2.39 [2.37,2.42] | 2.35 [2.32,2.37] | 2.35 [2.32,2.37] | 2.20 [2.14,2.26] | <0.001 | 0.38 |
|                   | B | 2.42 [2.32,2.51] | 2.4 [2.34,2.45]  | 2.39 [2.35,2.43] | 2.36 [2.31,2.41] | 2.33 [2.24,2.42] | 0.12   |      |

### ***Arterial Structure & Function***

|             |   |                  |                  |                  |                  |                  |        |       |
|-------------|---|------------------|------------------|------------------|------------------|------------------|--------|-------|
| Aortic Root | W | 3.23 [3.20,3.26] | 3.19 [3.17,3.21] | 3.18 [3.16,3.20] | 3.17 [3.15,3.20] | 3.22 [3.17,3.27] | 0.08   |       |
| Diameter    | B | 3.16 [3.08,3.23] | 3.15 [3.1,3.19]  | 3.14 [3.11,3.18] | 3.14 [3.10,3.17] | 3.13 [3.05,3.21] | 0.60   | 0.44  |
| (cm)        |   |                  |                  |                  |                  |                  |        |       |
| Ea          | W | 1.85 [1.80,1.89] | 1.80 [1.77,1.83] | 1.83 [1.81,1.86] | 1.78 [1.75,1.82] | 1.74 [1.66,1.82] | 0.31   |       |
| (mmHg/ml)   | B | 1.85 [1.73,1.97] | 1.90 [1.83,1.97] | 1.96 [1.91,2.01] | 1.92 [1.86,1.98] | 1.93 [1.80,2.05] | 0.43   | 0.52  |
| MAP         | W | 90 [89,91]       | 88 [87,89]       | 87 [87,88]       | 85 [84,86]       | 82 [81,84]       | <0.001 | <0.00 |
| (mmHg)      | B | 91 [88,94]       | 92 [91,94]       | 92 [90,93]       | 92 [90,93]       | 94 [91,97]       | 0.59   | 1     |
| PWV (cm/s)  | W | 1191 [1151,1232] | 1152 [1124,1180] | 1126 [1102,1151] | 1157 [1125,1190] | 1052 [984,1120]  | 0.02   |       |
|             | B | 1162 [1064,1260] | 1182 [1125,1239] | 1260 [1218,1302] | 1210 [1162,1258] | 1243 [1144,1342] | 0.31   | 0.24  |

---

Supplemental Table 9. Clinical characteristics at Visit 1 among participants in each of the 5 CVHS trajectories.

|                              | Trajectory of CVHS |            |            |            |            | Trend 1 | 5 vs 3  | 5 vs 2  | 5 vs 1  |
|------------------------------|--------------------|------------|------------|------------|------------|---------|---------|---------|---------|
|                              | 1 (n=577)          | 2 (n=1685) | 3 (n=2636) | 4 (n=1350) | 5 (n=272)  | to 4    |         |         |         |
| Age (years)                  | 53.2 ± 5.4         | 52.2 ± 5.3 | 52.0 ± 5.1 | 51.3 ± 4.8 | 53.4 ± 5.6 | <0.0001 | <0.0001 | 0.0013  | 0.72    |
| Male                         | 204 (35%)          | 638 (38%)  | 1155 (44%) | 544 (40%)  | 144 (53%)  | 0.003   | 0.004   | <0.0001 | <0.0001 |
| Black                        | 27 (5%)            | 211 (13%)  | 650 (25%)  | 577 (43%)  | 78 (29%)   | 0.0001  | 0.15    | <0.0001 | <0.0001 |
| Field Center                 |                    |            |            |            |            | 0.47    | 0.04    | <0.0001 | <0.0001 |
| Forsyth County               | 182 (14%)          | 53 (20%)   | 519 (20%)  | 470 (28%)  | 204 (35%)  |         |         |         |         |
| Jackson                      | 545 (40%)          | 71 (26%)   | 596 (23%)  | 179 (11%)  | 25 (4%)    |         |         |         |         |
| Minneapolis                  | 285 (21%)          | 90 (21%)   | 754 (29%)  | 468 (28%)  | 135 (23%)  |         |         |         |         |
| Washington County            | 338 (25%)          | 58 (21%)   | 767 (29%)  | 468 (28%)  | 135 (23%)  |         |         |         |         |
| <b><i>Co-morbidities</i></b> |                    |            |            |            |            |         |         |         |         |
| Hypertension                 | 19 (3%)            | 191 (11%)  | 690 (26%)  | 657 (49%)  | 85 (31%)   | 0.0001  | 0.08    | <0.0001 | <0.0001 |
| Smoking                      |                    |            |            |            |            | 0.0001  | 0.0246  | <0.0001 | <0.0001 |
| Current                      | 32 (6%)            | 186 (11%)  | 440 (17%)  | 443 (33%)  | 64 (24%)   |         |         |         |         |
| Former                       | 209 (36%)          | 568 (34%)  | 920 (35%)  | 368 (27%)  | 96 (35%)   |         |         |         |         |
| Never                        | 336 (58%)          | 928 (55%)  | 1273 (48%) | 537 (40%)  | 112 (41%)  |         |         |         |         |

|                                      |             |             |             |             |             |         |        |         |         |
|--------------------------------------|-------------|-------------|-------------|-------------|-------------|---------|--------|---------|---------|
| Diabetes                             | 4 (1%)      | 29 (2%)     | 153 (6%)    | 193 (15%)   | 7 (3%)      | 0.0001  | 0.03   | 0.33    | 0.02    |
| Coronary disease                     | 4 (1%)      | 28 (2%)     | 50 (2%)     | 38 (3%)     | 4 (2%)      | 0.002   | 0.62   | 0.81    | 0.27    |
| Prior MI                             | 3 (0.5%)    | 16 (1%)     | 41 (2%)     | 32 (2%)     | 3 (1%)      | 0.0002  | 0.56   | 0.81    | 0.35    |
| Stroke                               | 1 (0.2%)    | 9 (0.5%)    | 14 (0.5%)   | 20 (1.5%)   | 0           | 0.0009  | 0.23   | 0.23    | 0.49    |
| Heart Failure                        | 3 (0.5%)    | 8 (0.5%)    | 78 (3%)     | 71 (5%)     | 8 (3%)      | 0.0001  | 0.99   | <0.0001 | 0.003   |
| Atrial fibrillation                  | 0           | 2 (0.1%)    | 2 (0.1%)    | 1 (0.1%)    | 0           | 0.92    | 0.65   | 0.57    | .       |
| <b><i>Physical Exam Findings</i></b> |             |             |             |             |             |         |        |         |         |
| BMI (kg/m <sup>2</sup> )             | 22.7 ± 2.2  | 24.8 ± 3.5  | 28.0 ± 4.6  | 30.6 ± 5.2  | 27.1 ± 4.4  | <0.0001 | 0.0007 | <0.0001 | <0.0001 |
| SBP (mmHg)                           | 106 ± 11    | 111 ± 14    | 119 ± 15    | 125 ± 17    | 120 ± 16    | <0.0001 | 0.0996 | <0.0001 | <0.0001 |
| DBP (mmHg)                           | 66 ± 8      | 69 ± 9      | 74 ± 10     | 78 ± 11     | 75 ± 10     | <0.0001 | 0.0242 | <0.0001 | <0.0001 |
| Heart rate (bpm)                     | 63 ± 9      | 65 ± 9      | 66 ± 10     | 67 ± 10     | 65 ± 10     | <0.0001 | 0.0106 | 0.9684  | 0.047   |
| <b><i>Laboratory Values</i></b>      |             |             |             |             |             |         |        |         |         |
| Creatinine (mg/dl)                   | 0.70 ± 0.17 | 0.70 ± 0.17 | 0.73 ± 0.18 | 0.71 ± 0.18 | 0.75 ± 0.19 | 0.0011  | 0.0619 | <0.0001 | 0.0002  |
| LDL (mg/dl)                          | 112 ± 30    | 124 ± 36    | 136 ± 37    | 154 ± 37    | 141 ± 35    | <0.0001 | 0.0298 | <0.0001 | <0.0001 |
| HDL (mg/dl)                          | 62 ± 17     | 56 ± 18     | 51 ± 16     | 49 ± 15     | 53 ± 17     | <0.0001 | 0.089  | 0.0038  | <0.0001 |

---



Supplemental Table 10. Measures of cardiovascular structure and function at Visit 5 by CVHS trajectory. Values and P values are adjusted for age, gender, race, and field center.

|                                     | Trajectory 1            | Trajectory 2            | Trajectory 3            | Trajectory 4      | Trajectory 5            | Trend<br>1-4 | 5 vs 3 | 5 vs<br>2 | 5 vs 1 |
|-------------------------------------|-------------------------|-------------------------|-------------------------|-------------------|-------------------------|--------------|--------|-----------|--------|
| <b><i>LV Structure</i></b>          |                         |                         |                         |                   |                         |              |        |           |        |
| LVEDV (ml)                          | 76.2 [74.5,77.9]        | 78.3 [77.2,79.3]        | 80.3 [79.4,81.2]        | 81.2 [79.7,82.6]  | 81.2 [78.6,83.7]        | <0.001       | 0.43   | 0.05      | 0.001  |
| LV MWT (cm)                         | 0.91 [0.90,0.92]        | 0.94 [0.94,0.95]        | 0.99 [0.98,0.99]        | 1.01 [1.00,1.02]  | 0.95 [0.94,0.97]        | <0.001       | <0.001 | 0.49      | <0.001 |
| LV mass (g)                         | 122 [119,125]           | 135 [133,137]           | 147 [145,149]           | 155 [152,157]     | 136 [131,141]           | <0.001       | <0.001 | 0.8       | <0.001 |
| LVH                                 | 1.7 [0,4.3]             | 6.6 [5.0,8.1]           | 8.5 [7.2,9.7]           | 12.4 [10.3,14.5]  | 7.2 [3.4,10.9]          | <0.001       | 0.53   | 0.93      | 0.004  |
| <b><i>LV Systolic Function</i></b>  |                         |                         |                         |                   |                         |              |        |           |        |
| LVEF (%)                            | 65.9 [65.4,66.4]        | 66.2 [65.9,66.5]        | 66.1 [65.8,66.4]        | 66.0 [65.6,66.4]  | 66.3 [65.6,67.1]        | 0.84         | 0.64   | 0.87      | 0.92   |
| Longitudinal<br>strain (%)          | -18.6 [-18.9,-<br>18.4] | -18.4 [-18.6,-<br>18.3] | -18.2 [-18.3,-<br>18.1] | -18 [-18.2,-17.8] | -18.6 [-18.9,-<br>18.3] | <0.001       | 0.04   | 0.32      | 0.77   |
| <b><i>LV Diastolic Function</i></b> |                         |                         |                         |                   |                         |              |        |           |        |
| TDI e' (cm/s)                       | 6.12 [5.99,6.25]        | 5.86 [5.78,5.93]        | 5.63 [5.56,5.70]        | 5.56 [5.45,5.67]  | 5.66 [5.47,5.86]        | <0.001       | 0.69   | 0.08      | 0.004  |
| E/e' ratio                          | 10.7 [10.3,11.0]        | 11.5 [11.3,11.7]        | 12.2 [12.1,12.4]        | 12.8 [12.5,13.1]  | 12.0 [11.5,12.5]        | <0.001       | 0.38   | 0.07      | <0.001 |
| LA volume<br>(ml)                   | 41.1 [39.7,42.4]        | 43.5 [42.7,44.3]        | 46.8 [46.1,47.5]        | 48.2 [47.1,49.3]  | 45.8 [43.8,47.8]        | <0.001       | 0.46   | 0.06      | 0.001  |

***RV Function & Pulmonary Pressure***

|                      |                  |                  |                  |                  |                  |        |      |      |       |
|----------------------|------------------|------------------|------------------|------------------|------------------|--------|------|------|-------|
| RVFAC (%)            | 54.2 [53.5,54.9] | 53.0 [52.6,53.5] | 52.3 [51.9,52.6] | 52.7 [52.1,53.4] | 52.3 [51.2,53.4] | <0.001 | 0.93 | 0.2  | 0.002 |
| TR velocity<br>(m/s) | 2.31 [2.28,2.34] | 2.34 [2.32,2.35] | 2.39 [2.37,2.4]  | 2.45 [2.42,2.48] | 2.32 [2.27,2.36] | <0.001 | 0.01 | 0.21 | 0.93  |

***Arterial Structure & Function***

|                              |                     |                  |                     |                     |                     |        |      |      |      |
|------------------------------|---------------------|------------------|---------------------|---------------------|---------------------|--------|------|------|------|
| Aortic root<br>diameter (cm) | 3.12 [3.09,3.15]    | 3.16 [3.14,3.17] | 3.19 [3.18,3.21]    | 3.23 [3.2,3.25]     | 3.2 [3.16,3.24]     | <0.001 | 0.67 | 0.05 | 0.02 |
| Ea (mmHg/ml)                 | 1.80 [1.77,1.84]    | 1.84 [1.77,1.90] | 1.82 [1.80,1.85]    | 1.86 [1.83,1.88]    | 1.87 [1.82,1.91]    | 0.01   | 0.81 | 0.66 | 0.79 |
| MAP (mmHg)                   | 85 [84,86]          | 88 [87,89]       | 89 [88,89]          | 89 [89,90]          | 88 [86,89]          | <0.001 | 0.26 | 0.48 | 0.3  |
| PWV (cm/s)                   | 1081<br>[1044,1118] | 1140 [1118,1163] | 1173<br>[1154,1193] | 1244<br>[1211,1278] | 1139<br>[1081,1196] | <0.001 | 0.34 | 0.92 | 0.04 |

---

Supplemental Table 11. Measures of cardiovascular structure and function at Visit 5 by percent cumulative CVHS attained between Visits 1 and 5 using inverse probability attrition weighting. Values are adjusted for age, gender, race, and field center. Values are multivariable adjusted means and 95% confidence intervals.

|                                     | Category of percent cumulative ideal health score |                             |                             |                             |                           | p for trend |
|-------------------------------------|---------------------------------------------------|-----------------------------|-----------------------------|-----------------------------|---------------------------|-------------|
|                                     | <50%<br>(prevalence: 20%)                         | 50-60%<br>(prevalence: 24%) | 60-70%<br>(prevalence: 29%) | 70-80%<br>(prevalence: 15%) | ≥80%<br>(prevalence: 12%) |             |
| <b><i>LV Structure</i></b>          |                                                   |                             |                             |                             |                           |             |
| LVEDV (ml)                          | 82.6 [80.9,84.2]                                  | 80.1 [78.8,81.3]            | 78.6 [77.6,79.7]            | 76.7 [75.4,77.9]            | 76.4 [75.2,77.6]          | <0.001      |
| LV MWT (cm)                         | 1.03 [1.02,1.04]                                  | 1.00 [0.99,1.01]            | 0.97 [0.96,0.98]            | 0.94 [0.93,0.95]            | 0.92 [0.91,0.93]          | <0.001      |
| LV Mass (g)                         | 159 [156,163]                                     | 149 [146,151]               | 141 [139,143]               | 131 [129,133]               | 125 [123,127]             | <0.001      |
| LVH                                 | 14.3 [11.2,17.4]                                  | 10.0 [8.0,12.1]             | 7.5 [6.0,9.1]               | 6.1 [4.2,7.9]               | 2.9 [1.5,4.3]             | <0.001      |
| <b><i>LV Systolic Function</i></b>  |                                                   |                             |                             |                             |                           |             |
| LVEF (%)                            | 65.9 [65.4,66.5]                                  | 66.3 [66.0,66.7]            | 66.0 [65.7,66.3]            | 66.2 [65.8,66.6]            | 66.1 [65.7,66.5]          | 0.89        |
| Longitudinal strain (%)             | -17.9 [-18.1,-17.7]                               | -18.2 [-18.3,-18.0]         | -18.2 [-18.3,-18.1]         | -18.4 [-18.6,-18.3]         | -18.6 [-18.8,-18.4]       | <0.001      |
| <b><i>LV Diastolic Function</i></b> |                                                   |                             |                             |                             |                           |             |
| TDI e' (cm/s)                       | 5.46 [5.34,5.59]                                  | 5.61 [5.51,5.71]            | 5.62 [5.53,5.70]            | 5.80 [5.70,5.90]            | 6.02 [5.89,6.14]          | <0.001      |

|                                                    |                  |                  |                  |                  |                  |        |
|----------------------------------------------------|------------------|------------------|------------------|------------------|------------------|--------|
| E/e' ratio                                         | 13.1 [12.7,13.4] | 12.8 [12.6,13.1] | 12.0 [11.8,12.2] | 11.6 [11.4,11.9] | 11.1 [10.8,11.3] | <0.001 |
| LA volume (ml)                                     | 49.5 [48.1,50.8] | 47.4 [46.4,48.4] | 45.1 [44.2,45.9] | 42.7 [41.8,43.7] | 42.1 [41.2,43.1] | <0.001 |
| <b><i>RV Function &amp; Pulmonary Pressure</i></b> |                  |                  |                  |                  |                  |        |
| RVFAC (%)                                          | 52.6 [51.9,53.3] | 52.5 [51.9,53.0] | 52.4 [52.0,52.9] | 53.4 [52.8,53.9] | 54.0 [53.5,54.6] | <0.001 |
| TR velocity<br>(m/sec)                             | 2.47 [2.43,2.51] | 2.42 [2.39,2.45] | 2.37 [2.35,2.39] | 2.34 [2.31,2.37] | 2.32 [2.30,2.35] | <0.001 |
| <b><i>Arterial Structure &amp; Function</i></b>    |                  |                  |                  |                  |                  |        |
| Aortic root<br>diameter (cm)                       | 3.23 [3.20,3.25] | 3.21 [3.19,3.23] | 3.17 [3.15,3.19] | 3.13 [3.11,3.15] | 3.13 [3.11,3.16] | <0.001 |
| Ea (mmHg/ml)                                       | 1.81 [1.76,1.85] | 1.80 [1.77,1.83] | 1.86 [1.83,1.88] | 1.91 [1.87,1.94] | 1.84 [1.81,1.88] | 0.002  |
| MAP (mmHg)                                         | 90 [89,91]       | 89 [88,90]       | 89 [88,90]       | 88 [88,89]       | 86 [85,87]       | <0.001 |
| PWV (cm/s)                                         | 1297 [1250,1343] | 1240 [1196,1284] | 1202 [1167,1237] | 1166 [1139,1193] | 1126 [1100,1153] | <0.001 |

---

Supplemental Table 12. Measures of cardiovascular structure and function at Visit 5 by the category of slope of change in CVHS per decade from Visit 1 through Visit 5 using inverse probability attrition weighting. Values are adjusted for CVHS at Visit 1, age, gender, race, and field center. Values are multivariable adjusted means and 95% confidence intervals.

|                                    | Slope of change category                   |                                               |                                               |                                               |                                           | Adj P for trend |
|------------------------------------|--------------------------------------------|-----------------------------------------------|-----------------------------------------------|-----------------------------------------------|-------------------------------------------|-----------------|
|                                    | >1 point<br>↓/decade<br>n=1,236<br>(11.7%) | 0.5-1 point<br>↓/decade<br>n=2,701<br>(25.7%) | 0-0.5 point<br>↓/decade<br>n=3,633<br>(34.5%) | 0-0.5 point<br>↑/decade<br>n=2,415<br>(23.0%) | ≥0.5 point<br>↑/decade<br>n=537<br>(5.1%) |                 |
| <b><i>LV Structure</i></b>         |                                            |                                               |                                               |                                               |                                           |                 |
| LVEDV (ml)                         | 78.7 [77.1,80.3]                           | 78.7 [77.5,79.8]                              | 79.1 [78.1,80.0]                              | 79.0 [77.7,80.3]                              | 77.1 [74.6,79.7]                          | 0.83            |
| LV MWT (cm)                        | 1.00 [0.99,1.01]                           | 0.98 [0.98,0.99]                              | 0.97 [0.96,0.97]                              | 0.95 [0.95,0.96]                              | 0.92 [0.91,0.94]                          | <0.001          |
| LV mass (g)                        | 150 [147,154]                              | 144 [142,147]                                 | 141 [139,143]                                 | 135 [133,137]                                 | 127 [122,132]                             | <0.001          |
| LVH                                | 9.6 [7.1,12.2]                             | 9.4 [7.6,11.3]                                | 8.6 [7.1,10.2]                                | 5.4 [3.7,7.2]                                 | 5.2 [1.6,8.8]                             | 0.002           |
| <b><i>LV Systolic Function</i></b> |                                            |                                               |                                               |                                               |                                           |                 |

|                                                    |                     |                     |                     |                     |                     |        |
|----------------------------------------------------|---------------------|---------------------|---------------------|---------------------|---------------------|--------|
| LVEF (%)                                           | 66.2 [65.7,66.7]    | 66.2 [65.9,66.6]    | 66 [65.6,66.3]      | 66.2 [65.8,66.5]    | 66.4 [65.6,67.1]    | 0.96   |
| Longitudinal strain (%)                            | -18.1 [-18.4,-17.9] | -18.1 [-18.3,-18.0] | -18.2 [-18.3,-18.1] | -18.5 [-18.6,-18.3] | -18.7 [-19.1,-18.4] | 0.001  |
| <b><i>LV Diastolic Function</i></b>                |                     |                     |                     |                     |                     |        |
| TDI e' (cm/s)                                      | 5.49 [5.36,5.62]    | 5.58 [5.49,5.68]    | 5.73 [5.65,5.81]    | 5.81 [5.71,5.9]     | 5.90 [5.68,6.11]    | <0.001 |
| E/e' ratio                                         | 12.5 [12.2,12.8]    | 12.4 [12.2,12.6]    | 12.1 [11.9,12.3]    | 11.8 [11.5,12.0]    | 11.6 [11.1,12.1]    | <0.001 |
| LA volume (ml)                                     | 46.2 [45.0,47.4]    | 45.9 [45.0,46.8]    | 45.1 [44.3,45.9]    | 45.2 [44.2,46.2]    | 43.2 [41.1,45.2]    | 0.025  |
| <b><i>RV Function &amp; Pulmonary Pressure</i></b> |                     |                     |                     |                     |                     |        |
| RVFAC (%)                                          | 52.5 [51.7,53.2]    | 52.8 [52.3,53.3]    | 52.9 [52.5,53.3]    | 53.3 [52.7,53.8]    | 52.9 [51.8,54.0]    | 0.16   |
| TR velocity (m/s)                                  | 2.42 [2.39,2.45]    | 2.41 [2.39,2.44]    | 2.37 [2.35,2.39]    | 2.36 [2.33,2.38]    | 2.25 [2.20,2.29]    | <0.001 |
| <b><i>Arterial Structure &amp; Function</i></b>    |                     |                     |                     |                     |                     |        |
| Aortic root diameter (cm)                          | 3.21 [3.18,3.24]    | 3.18 [3.16,3.20]    | 3.17 [3.15,3.19]    | 3.16 [3.13,3.18]    | 3.19 [3.14,3.23]    | 0.09   |
| Ea                                                 | 1.85 [1.81,1.89]    | 1.82 [1.79,1.85]    | 1.87 [1.85,1.90]    | 1.83,1.80,1.87]     | 1.81 [1.75,1.88]    | 0.92   |

|            |                  |                     |                  |                  |                  |        |
|------------|------------------|---------------------|------------------|------------------|------------------|--------|
| (mmHg/ml)  |                  |                     |                  |                  |                  |        |
| MAP        |                  |                     |                  |                  |                  |        |
|            | 91 [90,92]       | 89 [88,90]          | 89 [88,89]       | 87 [86,88]       | 86 [84,88]       | <0.001 |
| (mmHg)     |                  |                     |                  |                  |                  |        |
| PWV (cm/s) | 1238 [1201,1275] | 1200<br>[1167,1234] | 1209 [1186,1233] | 1212 [1166,1259] | 1142 [1072,1212] | 0.26   |

---
